# Supplementary material for: Ligand assisted hydrogenation of levulinic acid on Pt(111) from first principles calculations
Source: Royal Society of Chemistry journal article supplement (doi:10.1039/d1cy02048j), 2022-01-01
Supplement: d1cy02048j1.pdf [file d1cy02048j1.pdf]

# Ligand assisted hydrogenation of levulinic acid on Pt(111) from first principles calculations: Supplementary Material

Lars Gell and Karoliina Honkala\*

*Nanoscience Center, P.O. Box 35 (YN) FI-40014, Department of Chemistry, University of  
Jyväskylä, Finland*

E-mail: karoliina.honkala@jyu.fi

## Area based adsorption energies

If we assume the covered area for the 2AQ modified Pt(111) surface as a rectangular box roughly the size of Figure 4a) we have an area of about  $210 \text{ \AA}^2$  leading to an adsorption energy of  $12.2 \text{ meV/\AA}^2$ . When both ligands are protonated the adsorption energy in this area would be  $16.0 \text{ meV/\AA}^2$ . When we assume a rectangular binding similar to Figure S4c) we get an area of about  $70 \text{ \AA}^2$  and an adsorption energy for LA2 of  $11.1 \text{ meV/\AA}^2$ .

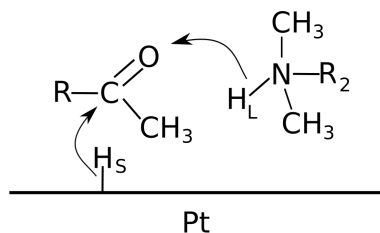

Figure S1: Schematic illustration of the possible reaction mechanisms for the hydrogenation reaction of levulinic acid in the presence of the AQ ligand. 1) In the alkoxo mechanism the surface bound hydrogen  $H_S$  is transferred first followed by the ligand bound  $H_L$ . 2) In the hydroxy mechanism  $H_L$  is transferred first followed by  $H_S$ . 3) In a concerted mechanism  $H_S$  and  $H_L$  are transferred simultaneously.

Table S1: Transition states and their corresponding imaginary frequencies and distances from Fig. 7.

| Symbol          | imaginary Frequency ( $\text{cm}^{-1}$ ) | C/O-H distance $\text{\AA}$ |
|-----------------|------------------------------------------|-----------------------------|
| TS <sub>1</sub> | 927.3i                                   | CH=1.45                     |
| TS <sub>2</sub> | 846.5i                                   | CH=1.44                     |
| TS <sub>3</sub> | 175.2i                                   | CH=2.03                     |
| TS <sub>4</sub> | 598.7i                                   | OH=1.55                     |
| TS <sub>5</sub> | 514.6i                                   | OH=1.58                     |
| TS <sub>6</sub> | 353.0i                                   | CH=1.94                     |
| TS <sub>7</sub> | 779.1i                                   | OH=1.40 CH=1.31             |
| TS <sub>8</sub> | 331.7i                                   | CH=1.72                     |

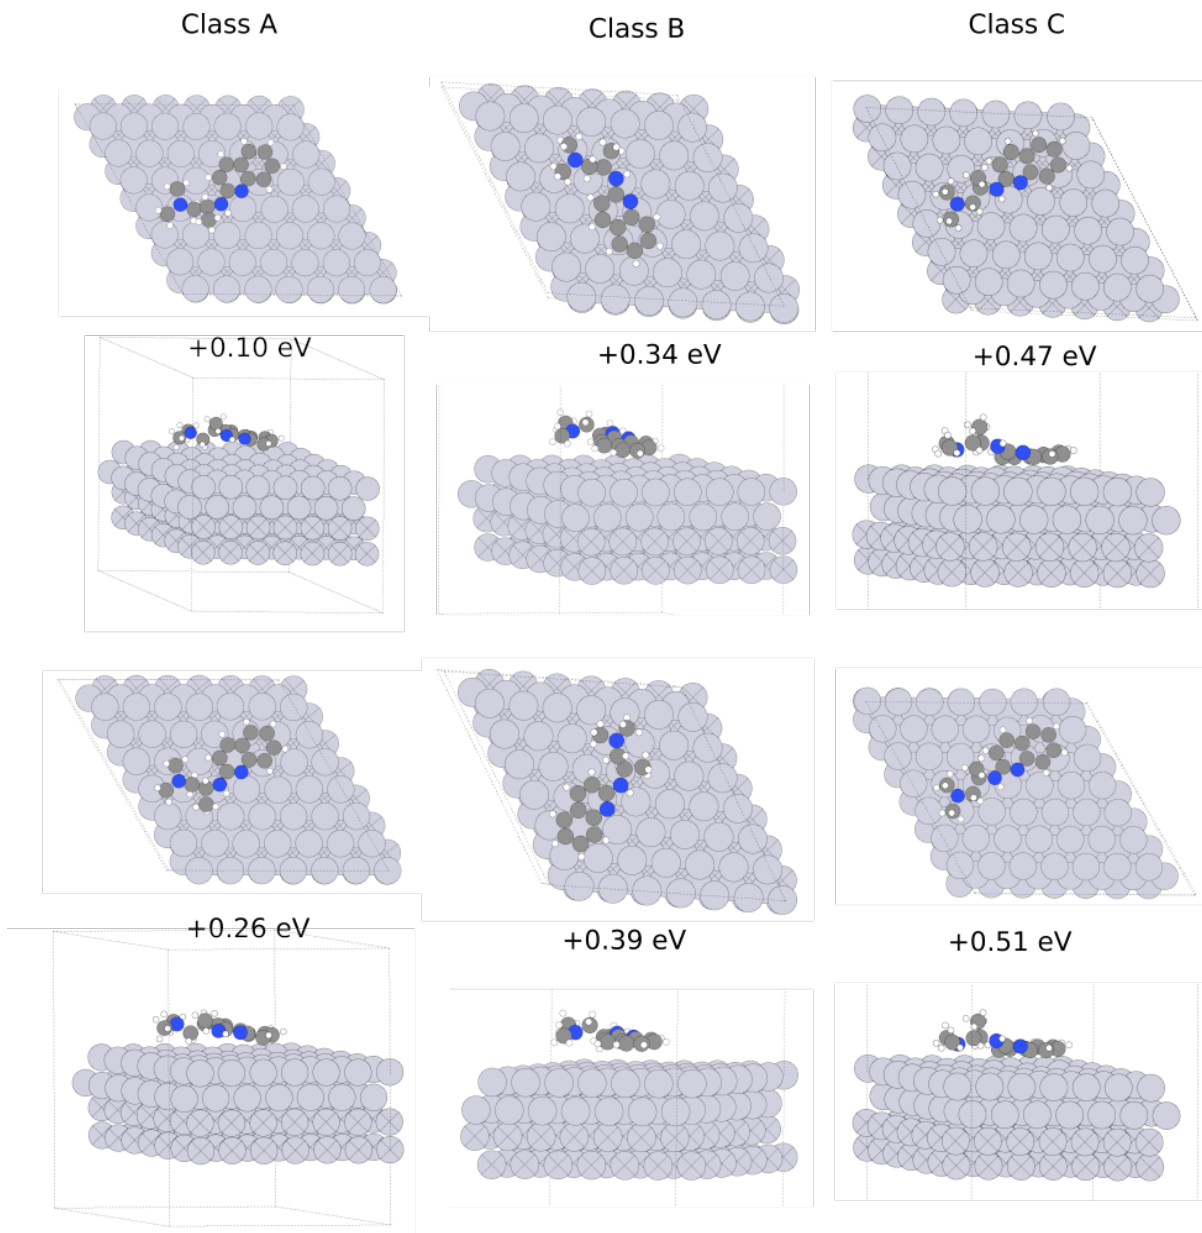

Figure S2: Other isomers of 1AQ adsorbed on Pt(111) sorted by class are presented.

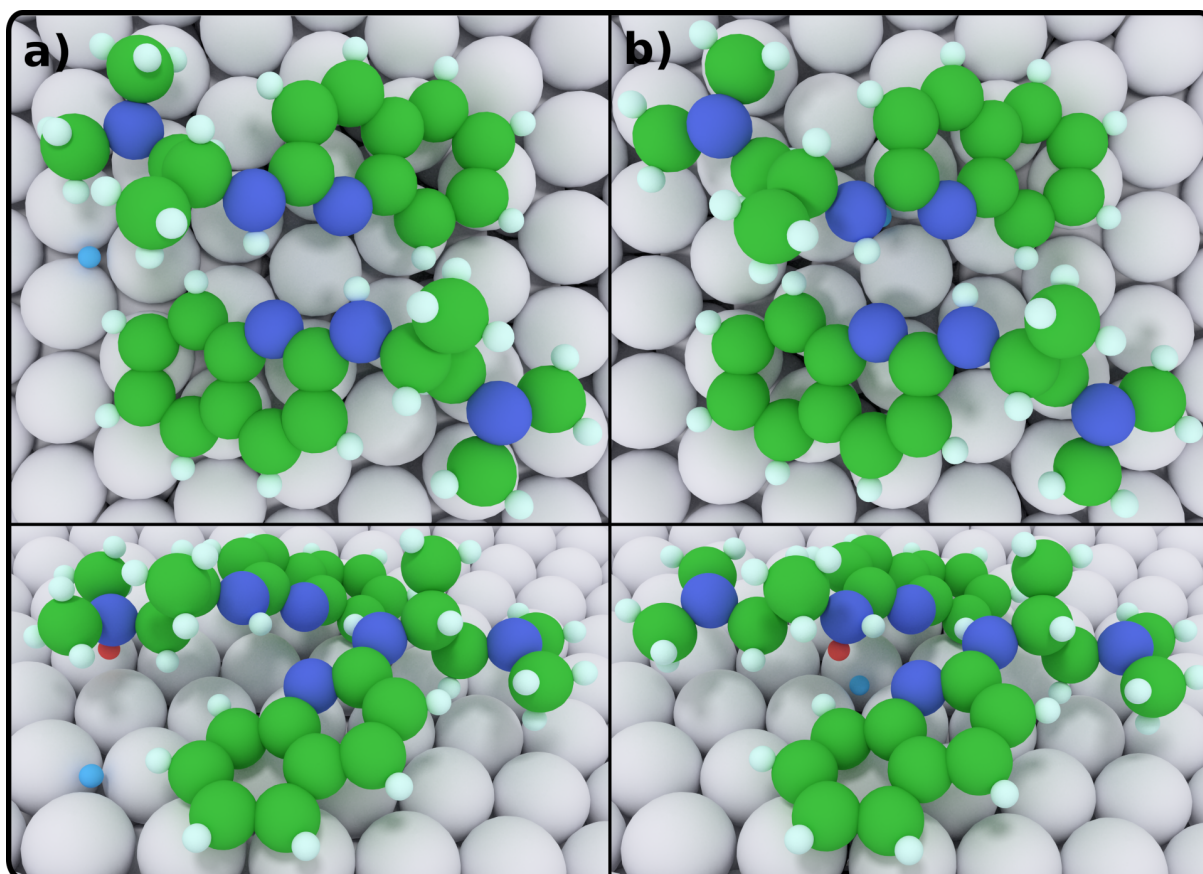

Figure S3: Hydrogen transfer to the AQ ligand in different positions. Difference in energy depending on the positioning of the transferred hydrogen atom. The transferred hydrogen atom is shown in red while the remaining one is displayed blue. The hydrogen transfer to N<sup>3</sup>-atom a) is thermodynamically favoured ( a 0.00 eV) over the transfer to the to N<sup>2</sup>-atom b) (+0.92 eV)



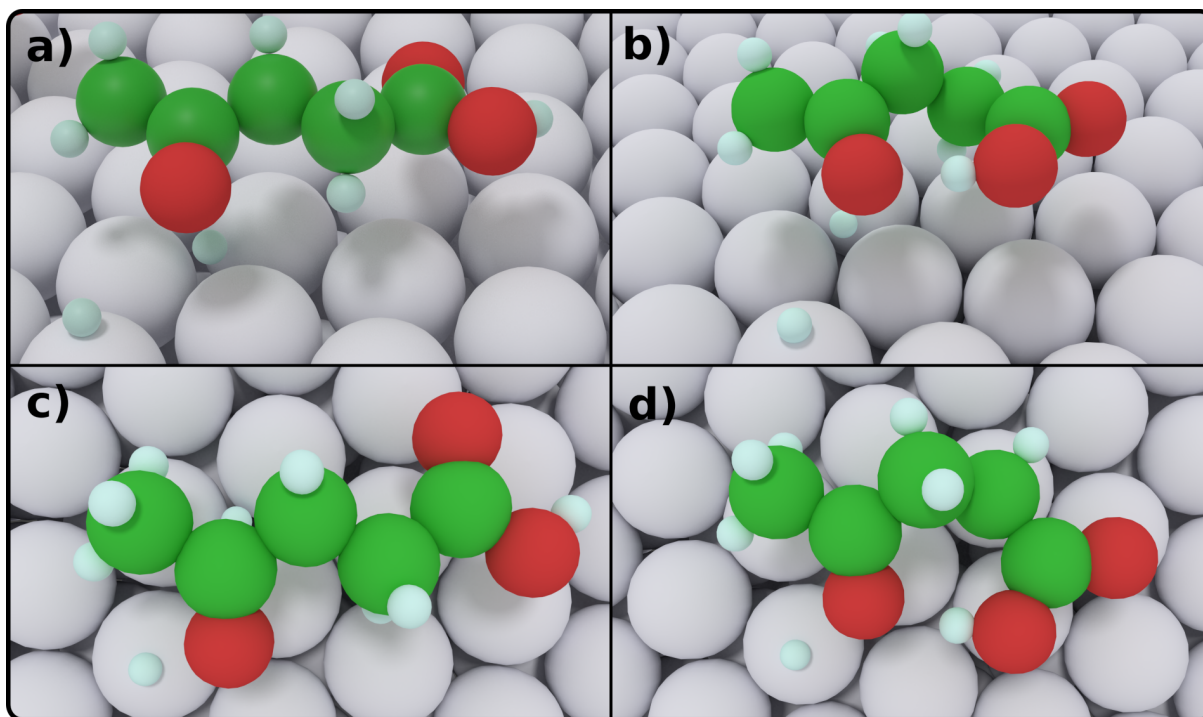

Figure S4: Adsorbed structures of LA1 (b, d) and LA2 (a, c) on 2H pre-covered Pt(111).

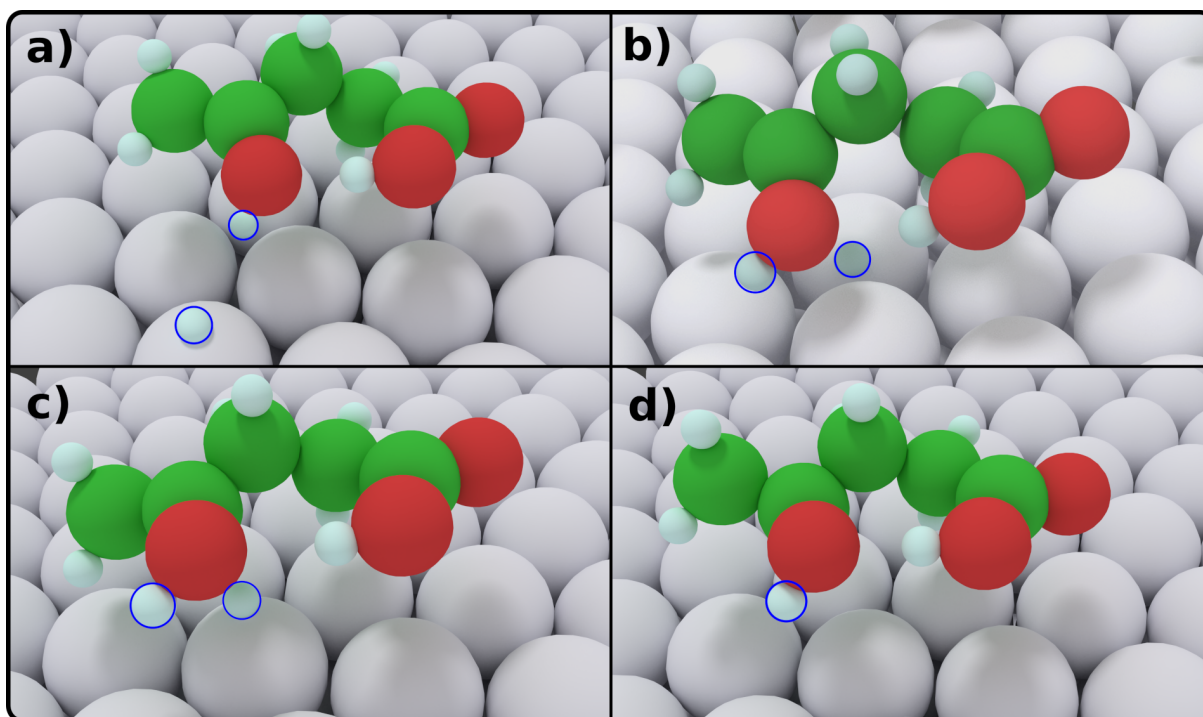

Figure S5: Initial  $I_3$  (a), intermediate  $I_5$  (b), transition  $TS_3$  (c) and final (d) state structure for levulinic acid with an internal hydrogen bond (LA1). Color code is as following: Carbon=green, Hydrogen=white, Oxygen=red, Platinum=grey, Nitrogen=blue.

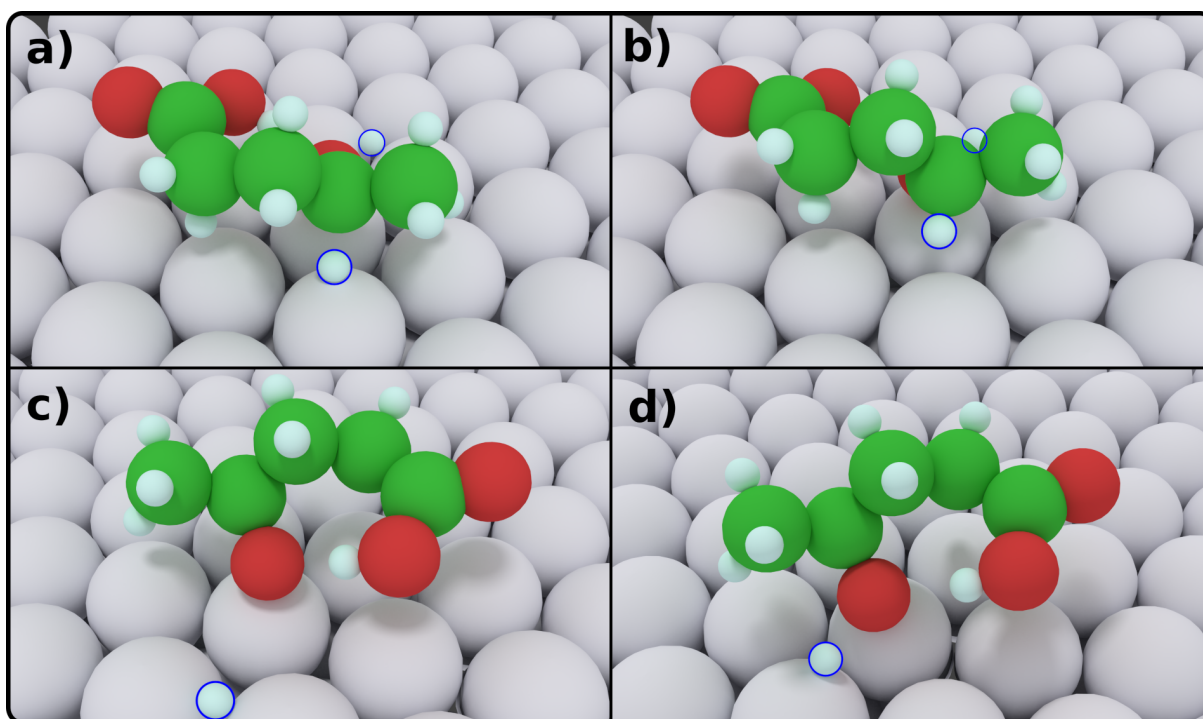

Figure S6:  $TS_1$  (a), Alkoxy intermediate  $I_6$  (b) and (c) and  $TS_4$  (d) from Fig. 7 and Table 2 of levulinic acid (LA1) Color code is as following: Carbon=green, Hydrogen=white, Oxygen=red, Platinum=grey, Nitrogen=blue.

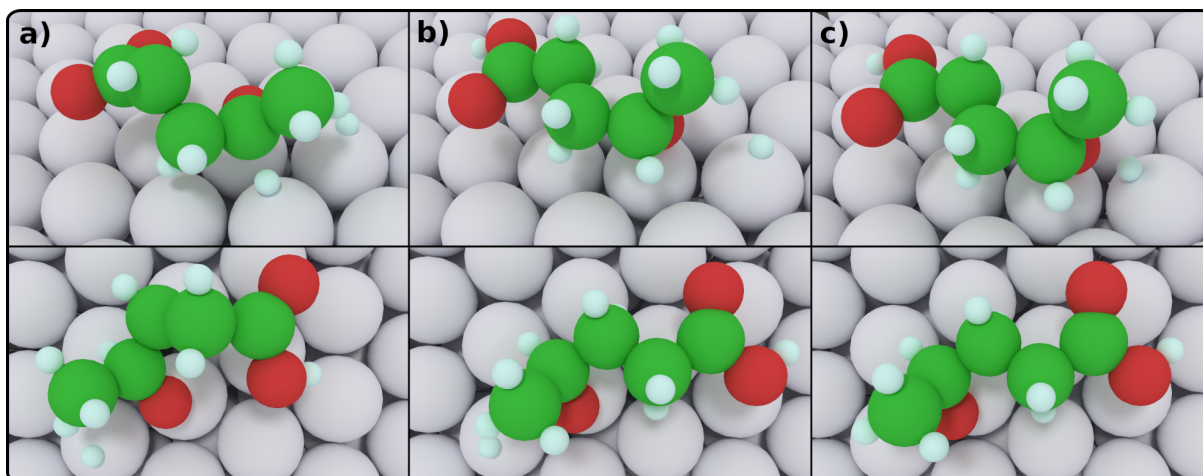

Figure S7:  $TS_2$  (a), Alkoxy intermediate  $I_7$  (b) and  $TS_5$  (c) from Fig. 7 and Table 2 of levulinic acid (LA2) in the side view (top) and top view (bottom). Color code is as following: Carbon=green, Hydrogen=white, Oxygen=red, Platinum=grey, Nitrogen=blue.



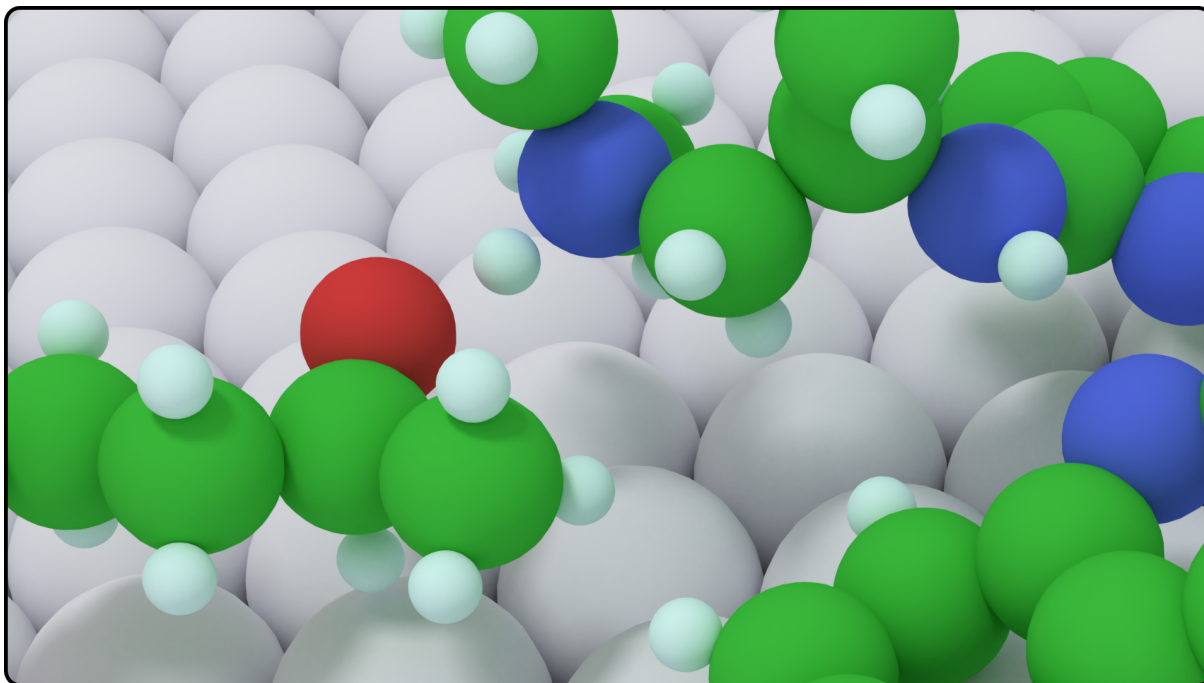

Figure S8: Detailed view of  $TS_7$  from Fig. 7.

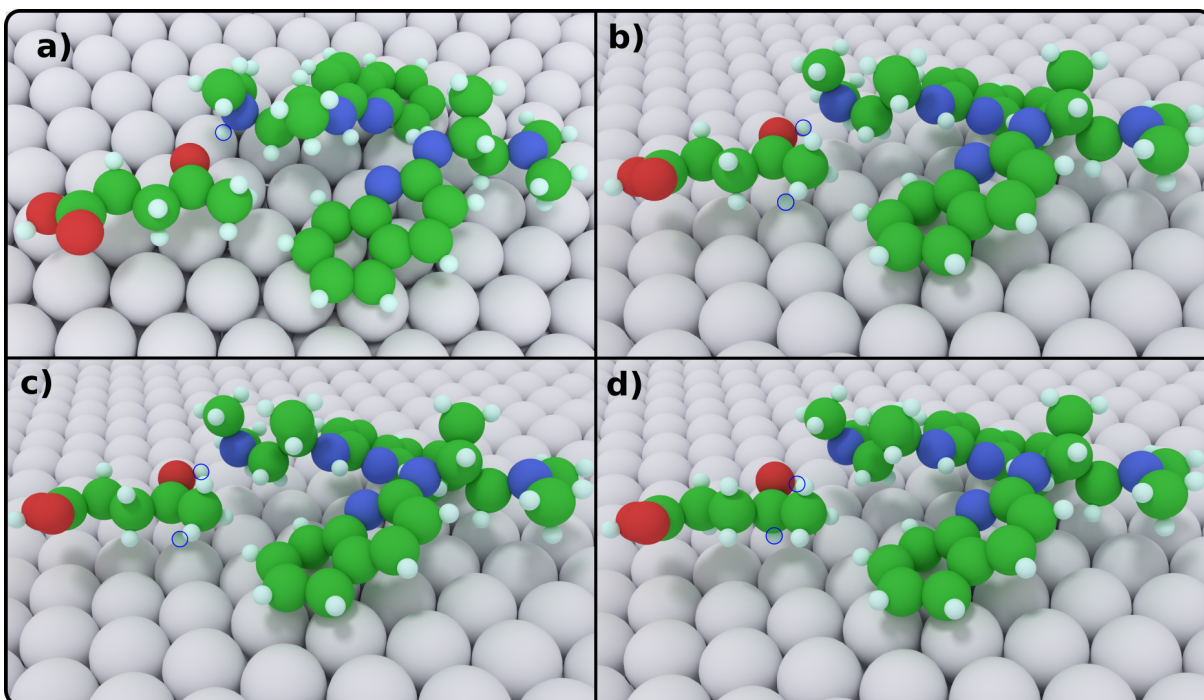

Figure S9: Structures for the hydrogenation reaction of levulinic acid on a Pt(111) surface in the presence of the 2AQH ligand via the hydroxy pathway. a)  $I_{12}$ , b)  $I_{13}$ , c)  $TS_8$  and d)  $I_{14}$  from Fig. 7.
